# Supplementary material for: FAH Domain Containing Protein 1 (FAHD-1) Is Required for Mitochondrial Function and Locomotion Activity in C. elegans
Source: PubMed Central journal article supplement (PMC4534308; doi:10.1371/journal.pone.0134161), 2015-08-12
Supplement: pone.0134161.s001.pdf [file pone.0134161.s001.pdf]

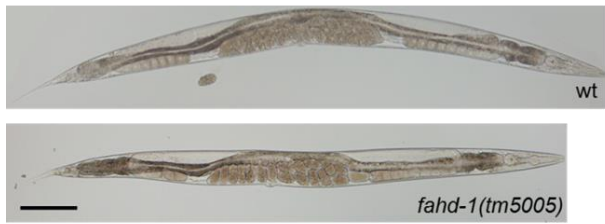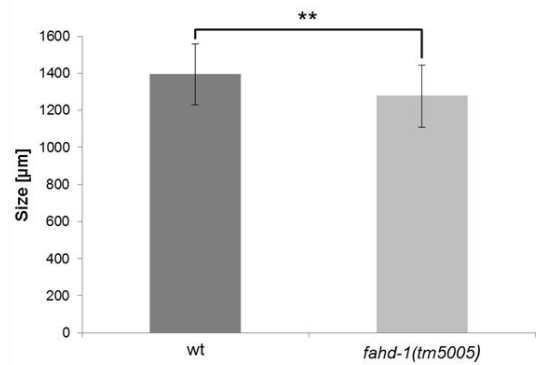

**Supplementary Fig. 1: *fahd-1(tm5005)* *C. elegans* have a slightly reduced body size**

4-day old gravid *fahd-1(tm5005)* and wild-type hermaphrodites were imaged (representative images shown in left panel) and their body size was determined (quantification shown on right panel). *fahd-1(tm5005)* *C. elegans* are slightly but significantly shorter compared to wild-type controls of the same age ( $1,395.14 \pm \text{SD } 164.41 \mu\text{m}$  for wt vs.  $1,277.56 \pm \text{SD } 167.67 \mu\text{m}$  for *fahd-1(tm5005)*;  $p = 0.0031$ ;  $N = 20$ ). Scale bar:  $100 \mu\text{m}$
