# Supplementary material for: FAH Domain Containing Protein 1 (FAHD-1) Is Required for Mitochondrial Function and Locomotion Activity in C. elegans
Source: PubMed Central journal article supplement (PMC4534308; doi:10.1371/journal.pone.0134161), 2015-08-12
Supplement: pone.0134161.s002.pdf [file pone.0134161.s002.pdf]

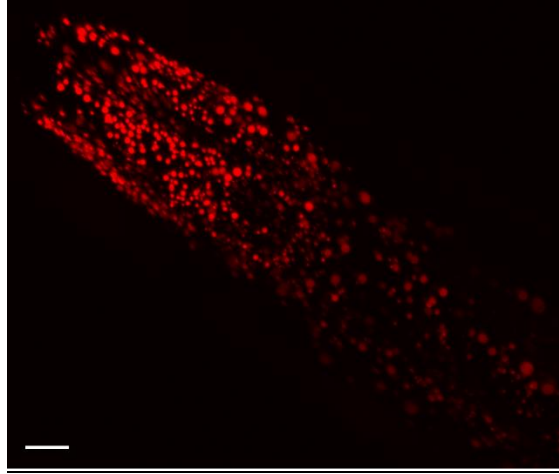

**Supplementary Fig. 2: The fluorescent dye TMRE specifically stains mitochondria dependent on mitochondrial membrane potential**

Confocal images (Z-stack projection) of the pharynx region of a 3-day old wild-type animal stained overnight with the membrane potential-sensitive mitochondrial dye tetramethylrhodamine ethyl ester (TMRE). Scale bar: 10  $\mu\text{m}$
