# Supplementary material for: FAH Domain Containing Protein 1 (FAHD-1) Is Required for Mitochondrial Function and Locomotion Activity in C. elegans
Source: PubMed Central journal article supplement (PMC4534308; doi:10.1371/journal.pone.0134161), 2015-08-12
Supplement: pone.0134161.s003.pdf [file pone.0134161.s003.pdf]

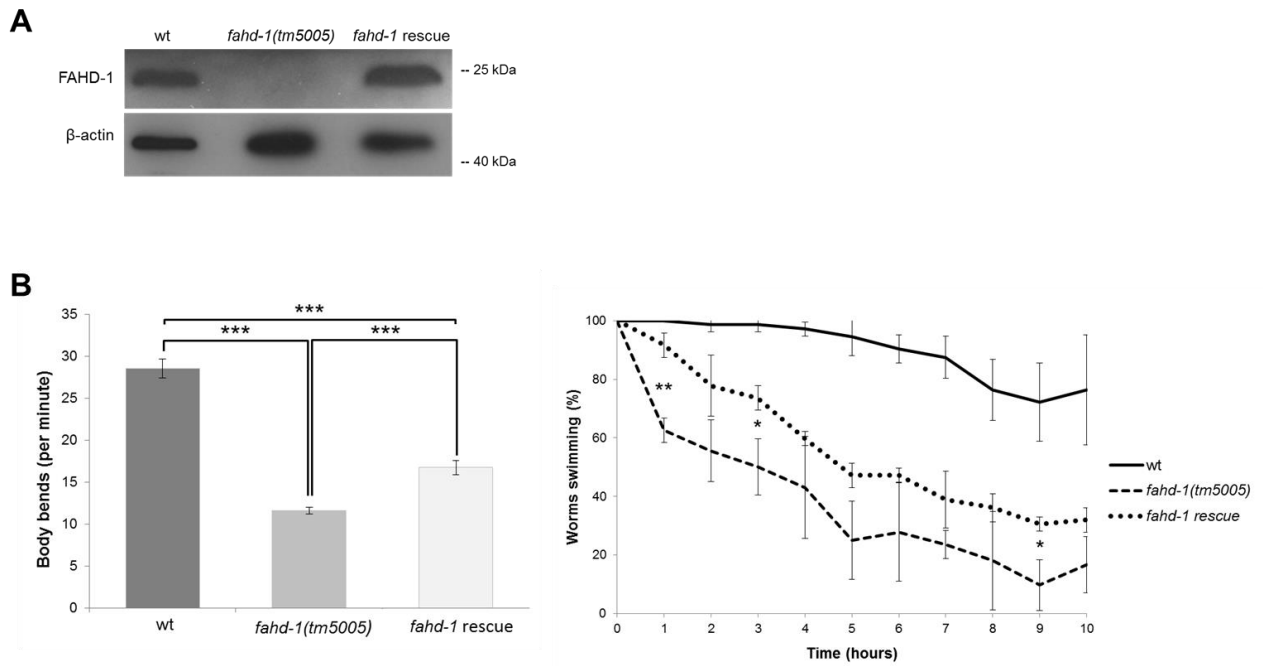

**Supplementary Fig. 3: The mobility defect of *fahd-1(tm5005)* *C. elegans* can be partly rescued**

(A) The presence of the FAHD-1 protein in *fahd-1;Ex[p<sub>fahd-1</sub>FAHD-1; L4040]* transgenic animals was shown by Western blot with a peptide-specific antibody against FAHD-1.  $\beta$ -actin served as a loading control. (B) *fahd-1;Ex[p<sub>fahd-1</sub>FAHD-1; L4040]* animals performed better than *fahd-1(tm5005)* mutants in the exploratory test (left panel; wt: 28.53  $\pm$ SD 1.12; *fahd-1(tm5005)*: 11.57  $\pm$ SD 0.42; rescue: 16.73  $\pm$ SD 0.85; N = 3 experiments (30 worms total)) and in the swimming assay (right panel; N = 3 experiments (72 worms total)).
